# Supplementary material for: Crosstalk between PML and p53 in response to TGF-β1: A new mechanism of cardiac fibroblast activation
Source: PubMed Central journal article supplement (PMC9910009; doi:10.7150/ijbs.76214), 2023-01-22
Supplement: ijbsv19p0994s1.pdf [file ijbsv19p0994s1.pdf]

## 1. Supplementary Figures

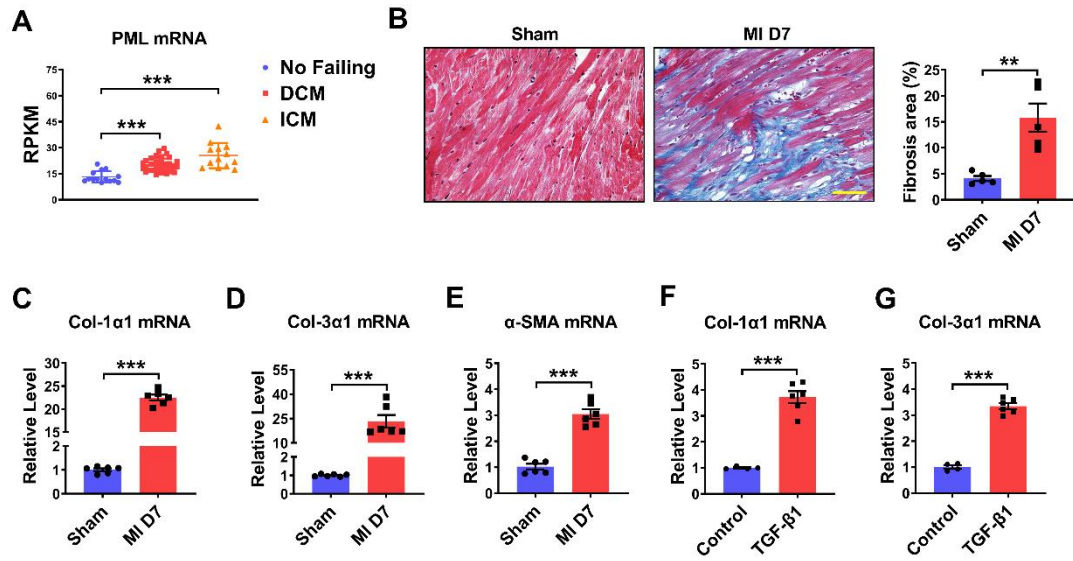

### Supplementary Figure S1. Successful establishment of cardiac fibrosis model in vivo and in vitro.

(A) The transcriptional expression of PML was examined in RNA-sequencing data (GSE116250) including patients with normal myocardium (No Failing;  $n = 14$ ), patients with dilated cardiomyopathy (DCM;  $n = 37$ ), and patients with ischemic cardiomyopathy (ICM;  $n = 13$ ). (B) Masson's trichrome staining of the LV sections of mouse hearts at 7 days after MI operation. Scale bar, 50  $\mu\text{m}$  ( $n = 5$ ). (C-E) qRT-PCR showing increased mRNA levels of Col-1 $\alpha$ 1, Col-3 $\alpha$ 1 and  $\alpha$ -SMA in the infarct border zone of mouse left ventricular tissues at 7 days after MI operation ( $n = 6$ ). (F-G) Following treatment with TGF- $\beta$ 1, Col-1 $\alpha$ 1 and Col-3 $\alpha$ 1 mRNA levels in CFs were examined by qRT-PCR ( $n = 4-6$ ). \*\* $P < 0.01$ , \*\*\* $P < 0.001$ .

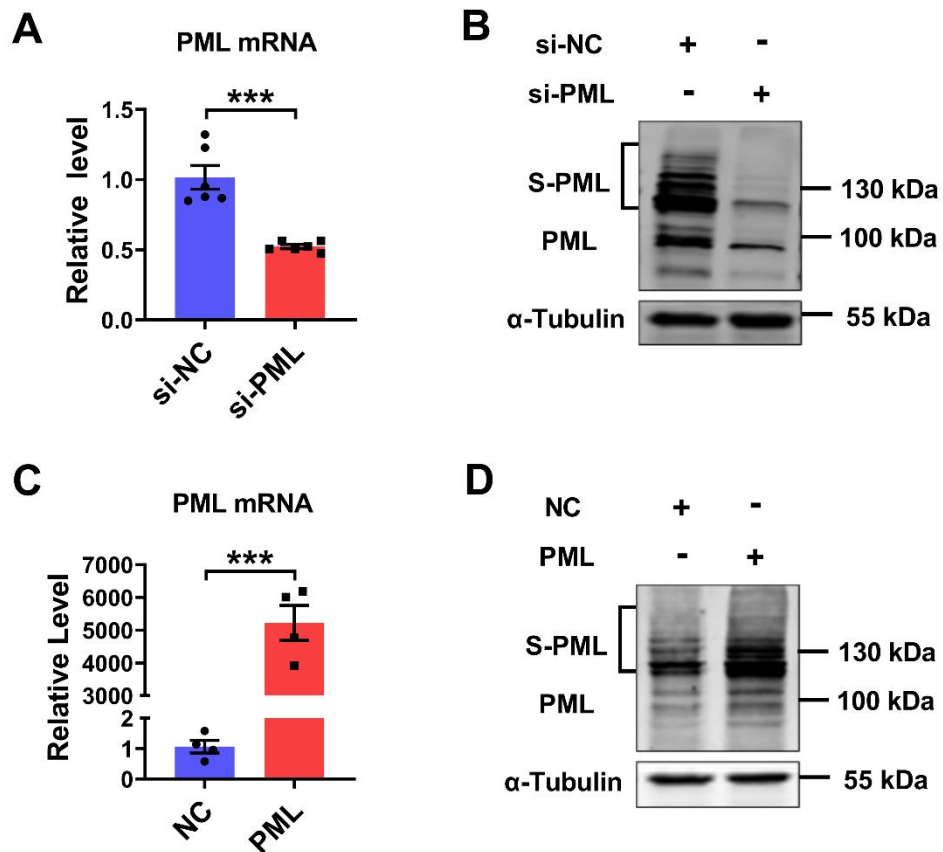

**Supplementary Figure S2. The transfection efficiency of PML knockdown and overexpression in cardiac fibroblasts.**

(A-D) qRT-PCR and western blot assay were used to verify PML knockdown or overexpression efficiency in CFs (n = 4-6). \*\*\* $P < 0.001$ .

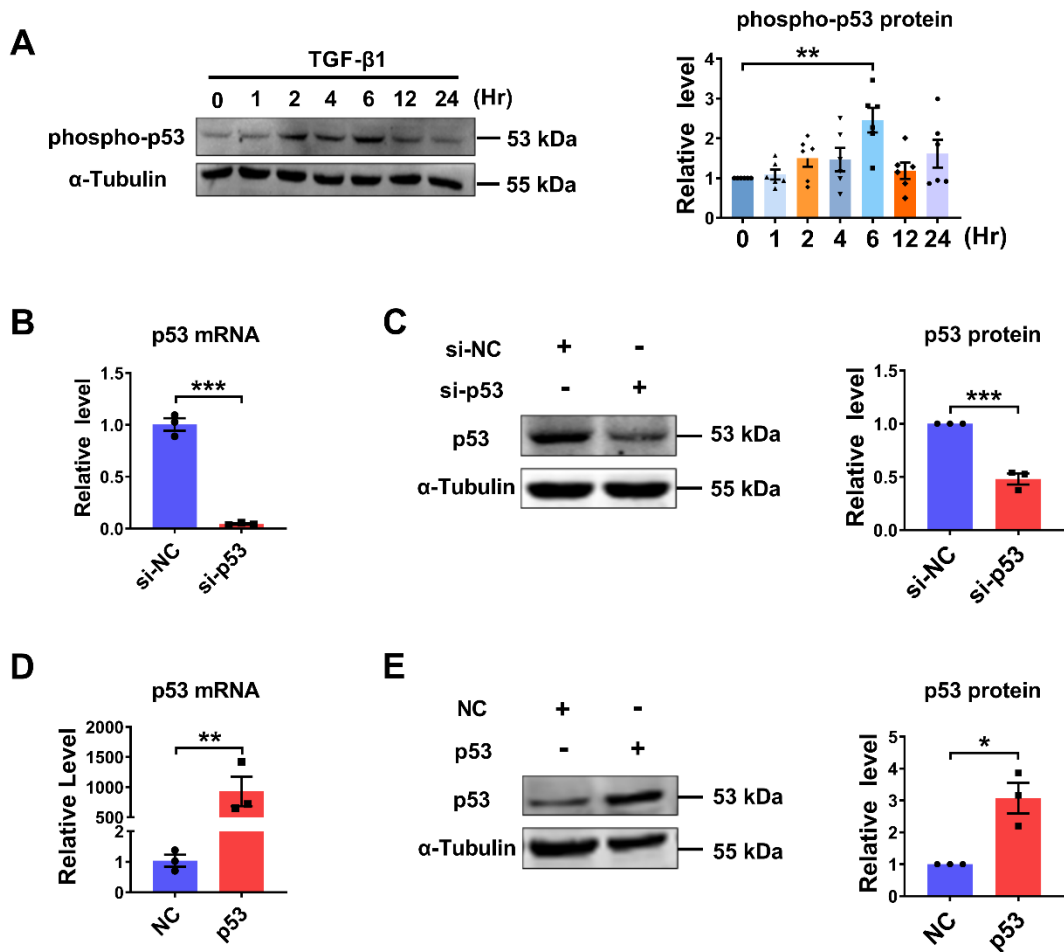

**Supplementary Figure S3. The transfection efficiency of p53 knockdown and overexpression in cardiac fibroblasts.**

(A) The protein level of phospho-p53 in CFs treated with TGF- $\beta$ 1 at the indicated time points (n = 6). (B-E) qRT-PCR and western blot assay were used to verify p53 knockdown or overexpression efficiency in CFs (n = 3). \* $P < 0.05$ , \*\* $P < 0.01$ , \*\*\* $P < 0.001$ .

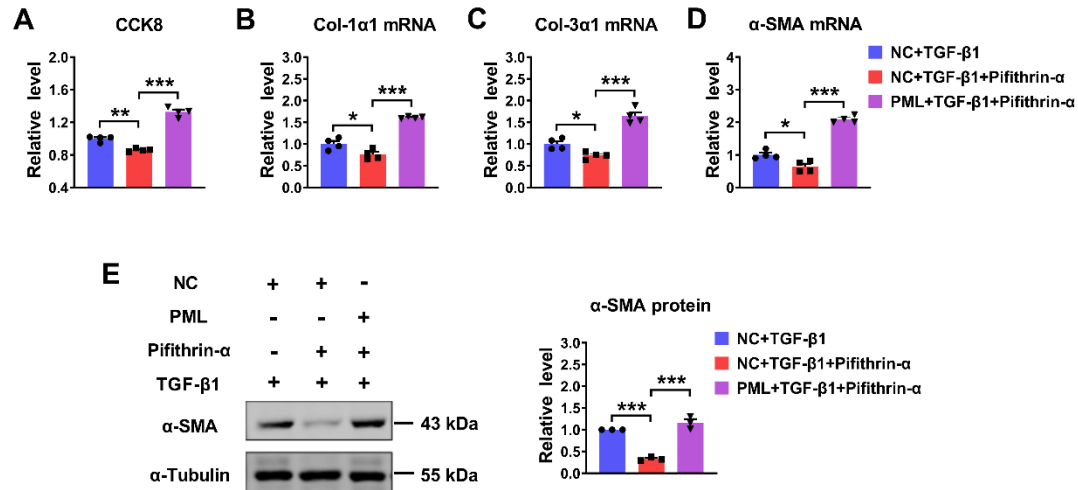

**Supplementary Figure S4. Overexpression of PML cancelled the anti-fibrotic effect of p53 depletion.**

(A) After transfection with PML plasmid, CFs were treated with or without Pifithrin-α in the presence of TGF-β1. Cell viabilities were examined by the CCK8 assay (n = 4). (B-D) qRT-PCR showing the mRNA levels of Col-1α1, Col-3α1 and α-SMA (n = 4). (E) Western blot quantification of α-SMA expression (n = 3). \* $P < 0.05$ , \*\* $P < 0.01$ , \*\*\* $P < 0.001$ .

## 2. Supplementary Tables

**Table S1 Sequences of the specific siRNAs**

| <b>Gene</b> | <b>Sense (5'-3')</b>      | <b>Antisense (5'-3')</b>  |
|-------------|---------------------------|---------------------------|
| si-PML      | GCUGAUCUCCGCGACA<br>UUTT  | AAUUGUCGCGGAGAUC<br>AGCTT |
| si-p53      | CAUUUUCAGGCUUAUG<br>GAATT | UCCCAUAAGCCUGAAA<br>AUGTT |

**Table S2 Quantitative real-time PCR primer sequences of genes**

| <b>Gene</b>      | <b>Forward primer (5'-3')</b> | <b>Reverse primer (5'-3')</b> |
|------------------|-------------------------------|-------------------------------|
| PML              | CCTTTTCTTTTGACGGA<br>CCA      | TGCAACACAGAGGCTTG<br>GC       |
| p53              | TGGAGGAGTCACAGTC<br>GGAT      | CAGTGAGGTGATGGCAG<br>GAT      |
| Col-1 $\alpha$ 1 | AAGAAGACATCCCTGAA<br>GTCA     | TTGTGGCAGATACAGAT<br>CAAG     |
| Col-3 $\alpha$ 1 | TTGGGATGCAGCCACCT<br>TG       | CGCAAAGGACAGATCCT<br>GAG      |
| TGF- $\beta$ 1   | CCTGAGTGGCTGTCTTT<br>TGACG    | AGTGAGCGCTGAATCGA<br>AAGC     |
| $\alpha$ -SMA    | CCCAGACATCAGGGAGT<br>AATGG    | TCTATCGGATACTTCAGC<br>GTCA    |
| GAPDH            | GACAGCAGTTGGTTGGA<br>GCA      | TTGGGAGGGTGAGGGA<br>CTTC      |

**Table S3 ChIP-qPCR primer sequences**

| <b>Gene</b> | <b>Forward primer (5'-3')</b> | <b>Reverse primer (5'-3')</b> |
|-------------|-------------------------------|-------------------------------|
| PML         | CTCACAGACAGGGAAAA<br>GCC      | CAAGCAAGTAAACAAGC<br>CCG      |
